# Supplementary material
Source: PubMed Central journal article supplement (PMC2807925)

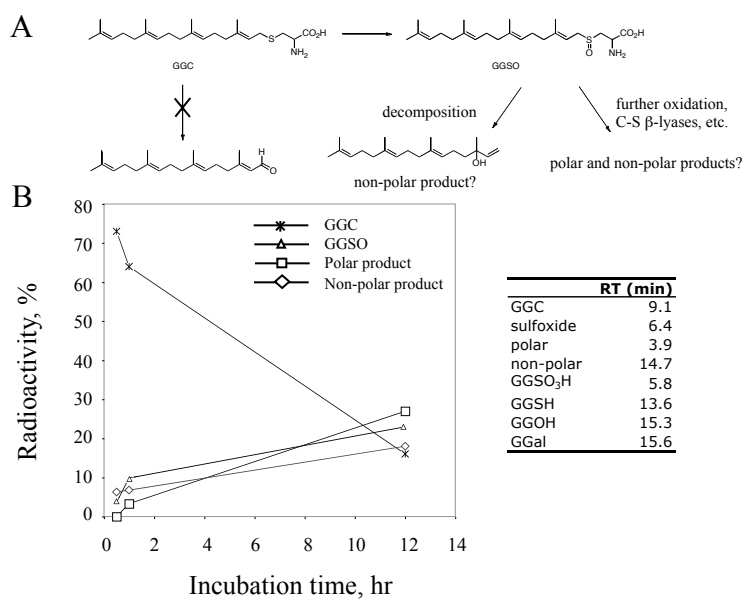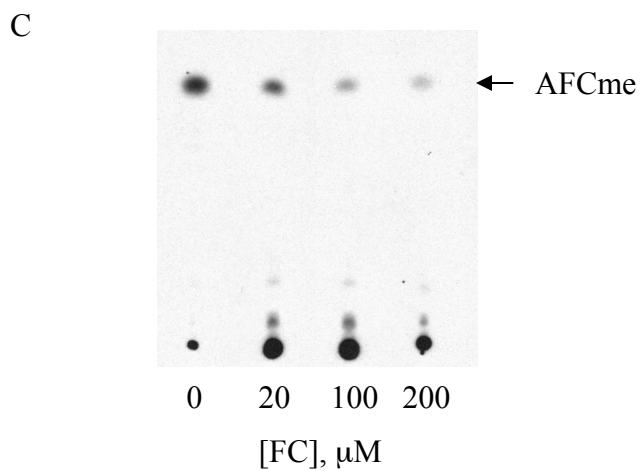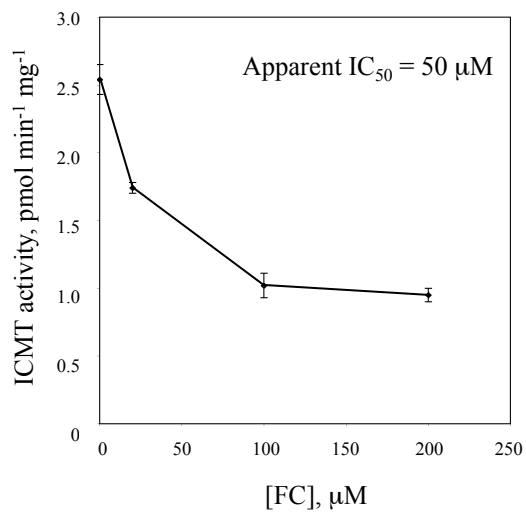

Supplement: ssp091_1.pdf [file ssp091_1.pdf]
